# Supplementary material for: The Role of S. cerevisiae Sub1/PC4 in Transcription Elongation Depends on the C-Terminal Region and Is Independent of the ssDNA Binding Domain
Source: MDPI journal article supplement (doi:10.3390/cells11203320), 2022-10-21
Supplement: s1 [file s1]

## SUPPLEMENTARY MATERIALS

**Table S1.** Yeast strains

| Strain   | Genotype                                                                                                 | Source      |
|----------|----------------------------------------------------------------------------------------------------------|-------------|
| OCSC1601 | <i>mat a, his3Δ1 leu2ΔO met15Δ0 ura3ΔO pRS316 [URA3 CEN]</i>                                             | This study  |
| OCSC1602 | <i>mat a, his3Δ1 leu2ΔO met15Δ0 ura3ΔO sub1::HIS3 [URA3 CEN]</i>                                         | This study  |
| OCSC1605 | <i>mat a, his3Δ1 leu2ΔO met15Δ0 ura3ΔO sub1ΔCT::HIS3 [URA3, TRP1 CEN]</i>                                | This study  |
| MGSC339  | <i>mat α ade2-1 can1-100 his3-11,15 leu2,3 trp1-1 ura3-1 spt4::URA3</i>                                  | A. Aguilera |
| OCSC1739 | <i>mat a ade2-1 his 3-11,15 leu2-3,112 trp1-1 ura3-1 sub1::KAN [URA3 CEN]</i>                            | This study  |
| OCSC1740 | <i>mat a ade2-1 his 3-11,15 leu2-3,112 trp1-1 ura3-1 sub1::KAN [SUB1-6HA::TRP1 HIS3 CEN]</i>             | This study  |
| OCSC1712 | <i>mat a ade2-1 his 3-11,15 leu2-3,112 trp1-1 ura3-1 sub1::KAN [SUB1-ΔCT-6HA::TRP1 HIS3 CEN]</i>         | [2]         |
| OCSC1742 | <i>mat a ade2-1 his 3-11,15 leu2-3,112 trp1-1 ura3-1 sub1::URA3 [SUB1-FRN54-56AGG-6HA::TRP1 CEN]</i>     | This study  |
| OCSC1743 | <i>mat a ade2-1 his 3-11,15 leu2-3,112 trp1-1 ura3-1 sub1::URA3 [SUB1-K45A-6HA::TRP1 CEN]</i>            | This study  |
| OCSC1744 | <i>mat a ade2-1 his 3-11,15 leu2-3,112 trp1-1 ura3-1 sub1::URA3 [SUB1-Y66A-6HA::TRP1 CEN]</i>            | This study  |
| OCSC1434 | <i>mat a ade2-1 his 3-11,15 leu2-3,112 trp1-1 ura3-1 Sub1-6HA::TRP1</i>                                  | This study  |
| OCSC2055 | <i>mat a ade2-1 his 3-11,15 leu2-3,112 trp1-1 ura3-1 SUB1-ΔCT-6HA::TRP1</i>                              | [2]         |
| GHY611   | <i>mat a his4-912δ leu2Δ1 trp1Δ63 lys-128δ SPT5-MYC</i>                                                  | [3]         |
| GHY94    | <i>mat a his3Δ200 leu2Δ1 trp1Δ63 ura3-52 lys-128δ spt5-194</i>                                           | G. Hartzog  |
| OCSC1658 | <i>mat a his3Δ200 leu2Δ1 trp1Δ63 ura3-52 lys-128δ spt5-194 [URA3, HIS3 CEN]</i>                          | This study  |
| OCSC181  | <i>mat a his3Δ200 leu2Δ1 trp1Δ63 ura3-52 lys-128δ spt5-194 sub1::URA3 [HIS3 CEN]</i>                     | [1]         |
| OCSC1660 | <i>mat a his3Δ200 leu2Δ1 trp1Δ63 ura3-52 lys-128δ spt5-194 sub1::URA3 [SUB1-6HA::TRP1 HIS3 CEN]</i>      | This study  |
| OCSC1663 | <i>mat a his3Δ200 leu2Δ1 trp1Δ63 ura3-52 lys-128δ spt5-194 sub1::URA3 [SUB1-Y66A-6HA::TRP1 HIS3 CEN]</i> | This study  |
| OCSC1661 | <i>mat a his3Δ200 leu2Δ1 trp1Δ63 ura3-52 lys-128δ spt5-194 sub1::URA3 [SUB1-ΔCT-6HA::TRP1 HIS3 CEN]</i>  | This study  |
| MGSC339  | <i>mat α ade2-1 can1-100 his3-11,15 leu2,3 trp1-1 ura3-1 spt4::URA3</i>                                  | [1]         |
| GYLR-3A  | <i>mat a, his3Δ1 leu2ΔO met15Δ0 ura3ΔO TRP1::HISG URA3::GAL1-YLR454w (FMP27)</i>                         | [4]         |
| OCSC1768 | <i>mat a, his3Δ1 leu2ΔO met15Δ0 ura3ΔO TRP1::HISG URA3::GAL1-YLR454w sub1::KAN</i>                       | [1]         |
| OCSC1769 | <i>mat a, his3Δ1 leu2ΔO met15Δ0 ura3ΔO TRP1::HISG URA3::GAL1-YLR454w sub1ΔCT::KAN</i>                    | This study  |

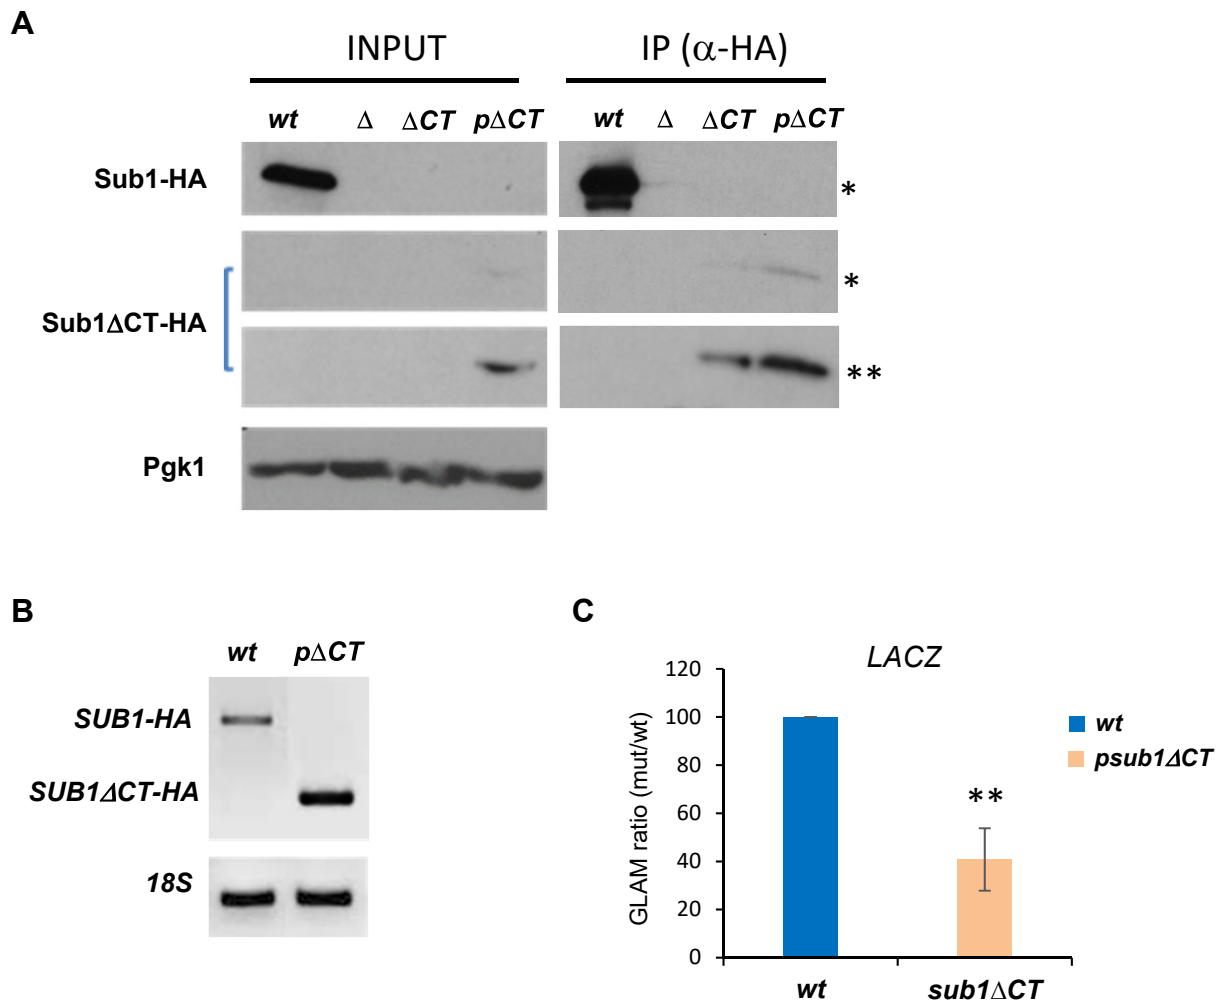

**Figure S1. The deletion of Sub1-CT severely affects Sub1 protein levels.** (A) Sub1-HA CoIP. Left panel: analysis of Sub1-6HA levels in *wt* and *sub1\Delta CT-6HA*, expressed either from the chromosomal copy ( $\Delta CT$ ) or from a centromeric plasmid (*p\Delta CT*) in whole cell extracts (INPUT); *sub1\Delta* cells were used as negative control and levels of Pgk1 as a loading control. Right panel: Immunoprecipitation of Sub1-HA (\*\*) using anti-HA antibody and WCE from the indicated strains. Two exposure of the same blot are shown: (\*) indicates same time of exposition, and (\*\*) it is and over-exposure to detect Sub1 $\Delta$ CT protein. (B). Analysis of *SUB1*-HA expression by RT-PCR in *wt* and *sub1\Delta CT* cells, expressing *SUB1* from a plasmid, and using primers annealing at the 5' region of *SUB1* and downstream at the HA epitope. 18S rRNA expression was used as a control. (C) **Increasing Sub1 $\Delta$ CT protein levels does not improve transcription elongation efficiency.** GLAM ratio of the *wt* strain, and the *sub1\Delta* strain expressing several copies of Sub1 $\Delta$ CT-HA protein from a centromeric plasmid (*p\Delta CT* in (A)). Relative values of acid phosphatase activity from the *PHO5-LACZ* long transcript are shown, where *wt* values has been set as 100. The GLAM ratio for the *sub1\Delta CT* strain is significantly lower than for *wt* cells. Significant level \*\* =  $p < 0.01$ .

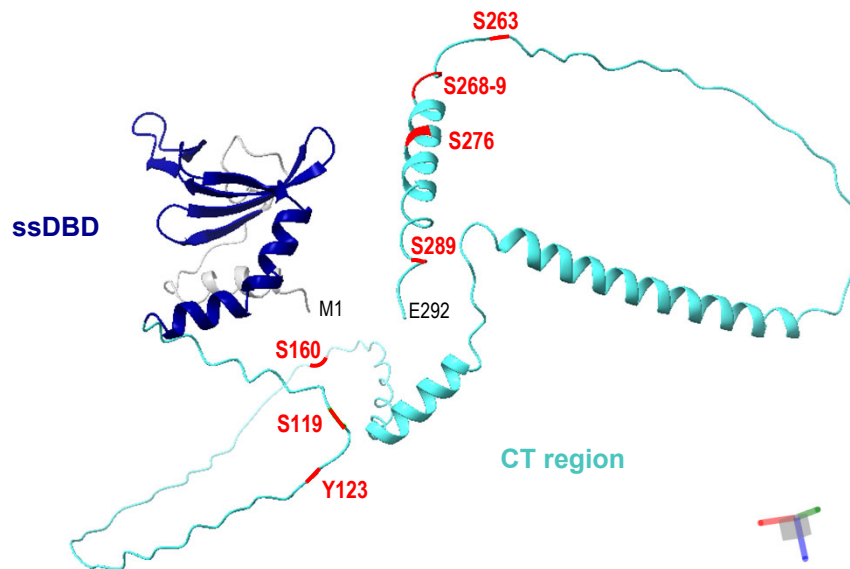

**Figure S2. Phosphorylation of Sub1-CT could be important for Sub1 function regulation.** ScSub1 structure as predicted by the AphaFold2 program [36] (<https://alphafold.ebi.ac.uk/entry/P54000>). The ssDBD is shown in dark blue, and the CT region in light blue. Phosphorylation sites described in proteomic studies [59–67] are indicated in red.

## References

1. Garcia, A.; Collin, A.; Calvo, O. Sub1 associates with Spt5 and influences RNA polymerase II transcription elongation rate. *Mol Biol Cell* **2012**, *23*, 4297–4312, doi:10.1091/mbc.E12-04-0331.
2. Garavis, M.; Gonzalez-Polo, N.; Allepuz-Fuster, P.; Louro, J.A.; Fernandez-Tornero, C.; Calvo, O. Sub1 contacts the RNA polymerase II stalk to modulate mRNA synthesis. *Nucleic Acids Res* **2017**, *45*, 2458–2471, doi:10.1093/nar/gkw1206.
3. Lindstrom, D.L.; Squazzo, S.L.; Muster, N.; Burckin, T.A.; Wachter, K.C.; Emigh, C.A.; McCleery, J.A.; Yates, J.R., 3rd; Hartzog, G.A. Dual roles for Spt5 in pre-mRNA processing and transcription elongation revealed by identification of Spt5-associated proteins. *Mol Cell Biol* **2003**, *23*, 1368–1378.
4. Jimeno-Gonzalez, S.; Haaning, L.L.; Malagon, F.; Jensen, T.H. The yeast 5'-3' exonuclease Rat1p functions during transcription elongation by RNA polymerase II. *Mol Cell* **2010**, *37*, 580–587, doi: 10.1016/j.molcel.2010.01.019.
